# Supplementary material for: Growth Hormone Upregulates Melanocyte-Inducing Transcription Factor Expression and Activity via JAK2-STAT5 and SRC Signaling in GH Receptor-Positive Human Melanoma
Source: PubMed Central journal article supplement (PMC6769493; doi:10.3390/cancers11091352), 2019-09-12
Supplement: cancers-11-01352-s001.pdf [file cancers-11-01352-s001.pdf]

***Title:* Growth hormone (GH) upregulates melanocyte inducing transcription factor (MITF) expression and activity via JAK2-STAT5 and SRC signaling in GH receptor (GHR) – positive human melanoma.**

***Authors:*** Reetobrata Basu<sup>1</sup>, Prateek Kulkarni<sup>1,3</sup>, Yanrong Qian<sup>1</sup>, Christopher Walsh<sup>4</sup>, Pranay Arora<sup>4</sup>, Emily Davis<sup>1,2</sup>, Silvana Duran-Ortiz<sup>1,3</sup>, Kevin Funk<sup>1,3</sup>, Diego Ibarra<sup>1,2</sup>, Colin Kruse<sup>1,3</sup>, Sam Mathes<sup>1</sup>, Todd McHugh<sup>1</sup>, Alison Brittain<sup>3,4</sup>, Darlene E. Berryman<sup>1,4,5</sup>, Edward O. List<sup>1</sup>, Shigeru Okada<sup>1,4</sup>, John J. Kopchick<sup>1,4</sup>

***Affiliations:*** <sup>1</sup>Edison Biotechnology Institute, Ohio University (OU), <sup>2</sup>Dept. of Chemistry and Biochemistry, OU, <sup>3</sup>Molecular and Cellular Biology (MCB) Program, Dept. of Biological Sciences, OU, <sup>4</sup>Dept. of Biomedical Sciences, Ohio University Heritage College of Osteopathic Medicine, Athens, OH, <sup>5</sup>The Diabetes Institute, Ohio University, Athens, OH

## **SUPPLEMENTARY FIGURES**

**Sup-Fig 1: Drug treatment induced autocrine GH expression correlates with ABC-transporter expression in human melanoma cells → DOX = Doxorubicin; VEM = Vemurafenib; CRI = Crizotinib; CAB = Cabozantinib**

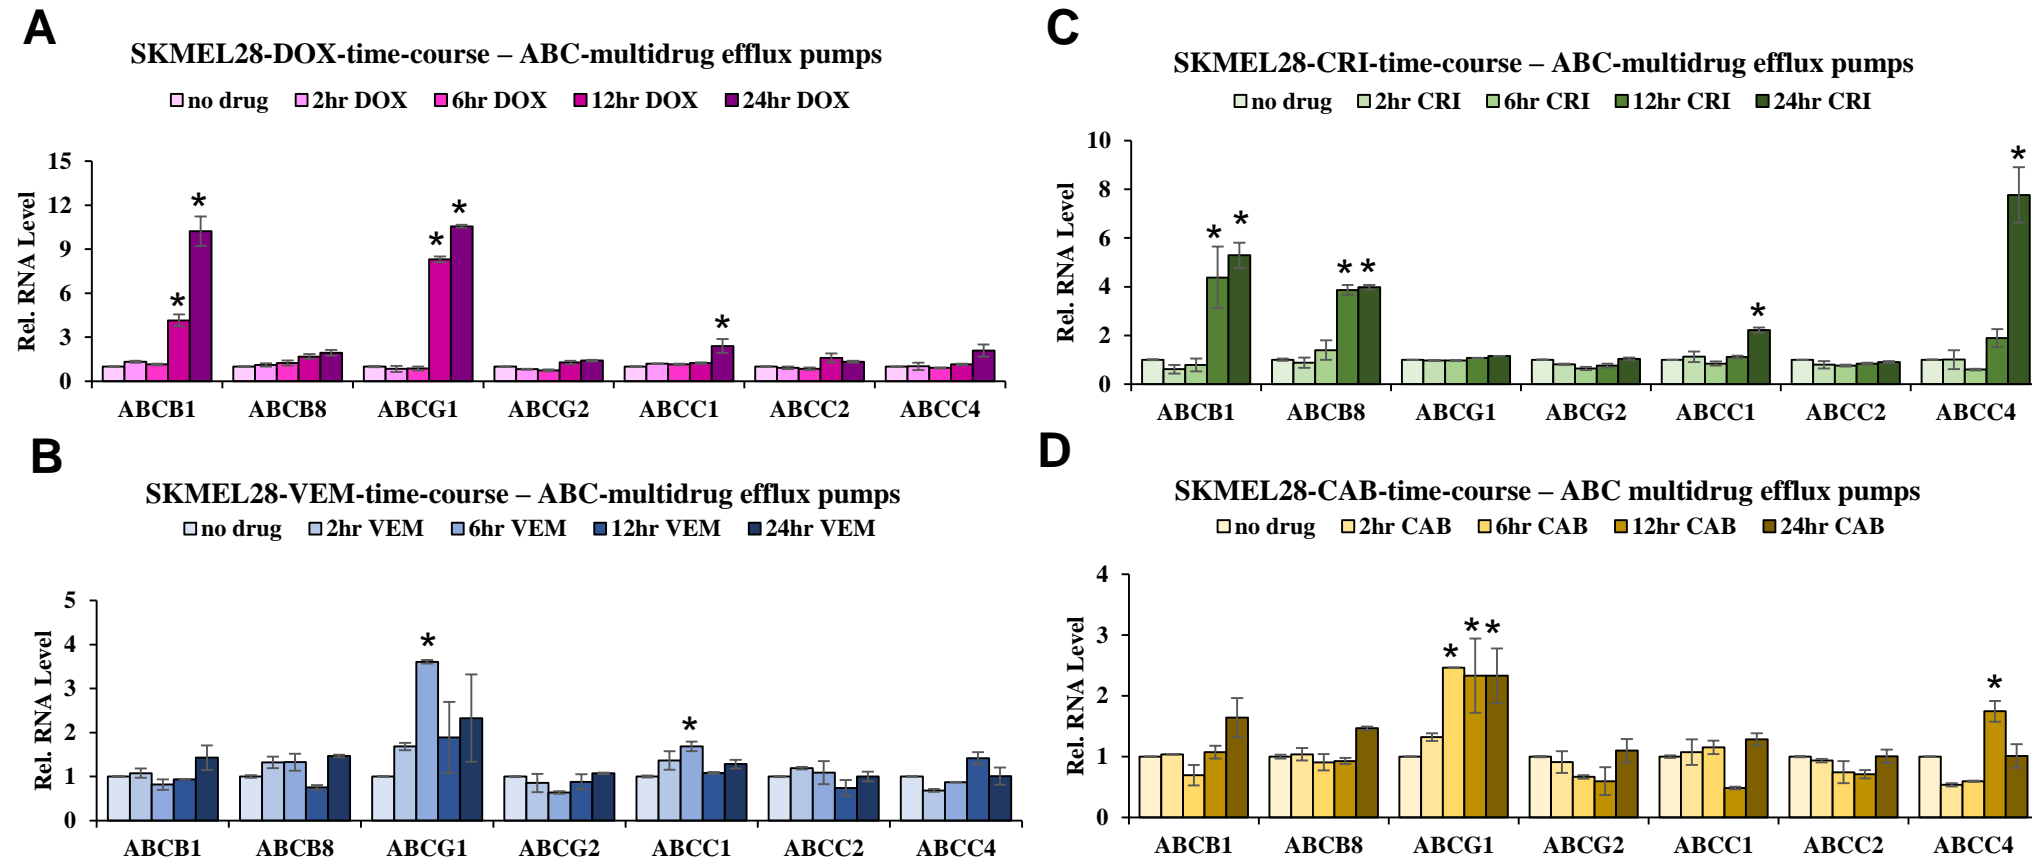

**Sup-Fig 1: Drug treatment induced autocrine GH expression correlates with ABC-transporter expression in human melanoma cells: (A-D) – Human melanoma cells SK-MEL-28 were treated with anti-cancer compounds and RNA expressions was compared with respective untreated controls, at 2, 6, 12, and 24-hr timepoints by RT-qPCR with corresponding pre-validated primers (sequence in supplementary table 1) for target genes. Changes in GH are shown in Fig-1. Here changes in expression of ABC-transporters with time, to doxorubicin (A), vemurafenib (B), crizotinib (C) and cabozantinib (D) treatments are shown. RNA expressions were quantified by RT-qPCR and normalized against expression of bTUB and ACTB as reference genes [\*],  $p < 0.05$ , Wilcoxon sign rank test,  $n = 3$ ].**

Sup-Fig 1E: GH treatment directly upregulates ABC-transporter gene expression in human melanoma cell SK-MEL-28

E

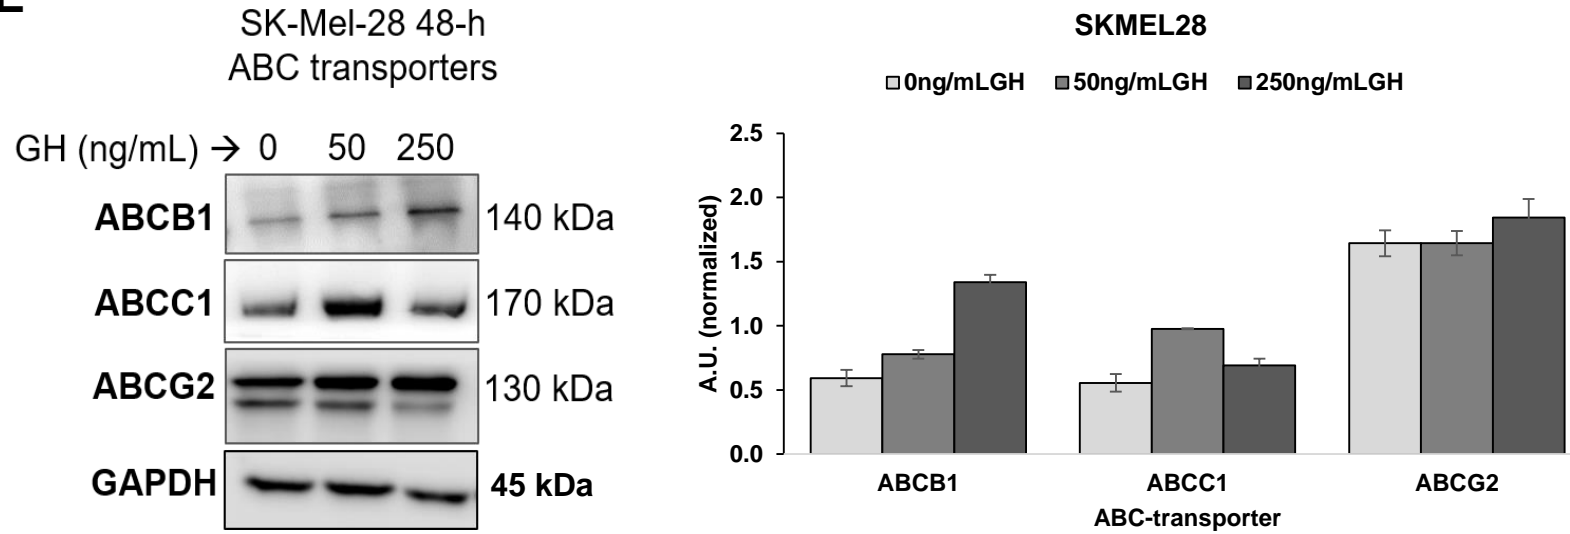

**Sup-Fig 1E: GH treatment directly upregulates ABC-transporter proteins in human melanoma cells:** F – Human amelanotic melanoma cells SK-MEL-28 were treated with increasing doses (0, 50, 250ng/mL) of recombinant human growth hormone (GH) for 48-hr and cell lysate was analyzed by western blot for ABC-transporters ABCB1, ABCC1, and ABCG2. Image quantification was done using ImageJ and results were normalized against GAPDH expression.

**Sup-Fig 2: GH treatment directly upregulates MITF and MITF target RNA expressions in human melanoma cells: (A-B)** – Human melanotic melanoma cells SK-MEL-30 were treated with increasing doses (0, 50, 100, 200ng/mL) of recombinant human growth hormone (GH) and heatmap showing changes in RNA expressions at 6, 24, and 48-hr timepoints were analyzed for GH, GHR, MITF and a number of MITF-targets, as well as ABC-transporters ABCB5, ABCG2 (A); Identical experiment was performed in presence of 200nM doxorubicin (B). Numbers inside boxes indicate fold-change in gene expression compared to GH untreated control. Similar set of experiments for amelanotic melanoma cells SK-MEL-28 is shown in Sup-Fig 2. Further, using melanotic melanoma cells MALME-3M (C) and MDA-MB-435 (D), we treated with either doxorubicin (dox), or cisplatin (cis), or vemurafenib (vem) for 24-hr timepoint only, in absence / presence of 50ng/mL GH along with siRNA-mediated GHRKD. Drug-specific response was seen, and GHRKD suppressed expression of multiple MITF-targets. Similar experiments with MDA-MB-435 cells is shown in Sup-Fig 3. RNA expressions were quantified by RT-qPCR and normalized against expression of  $\beta$ TUB and ACTB as reference genes [\*],  $p < 0.05$ , Wilcoxon sign rank test,  $n = 3$ ].

Sup-Fig 2: GH treatment directly upregulates MITF and MITF target RNA expressions in human melanoma cells

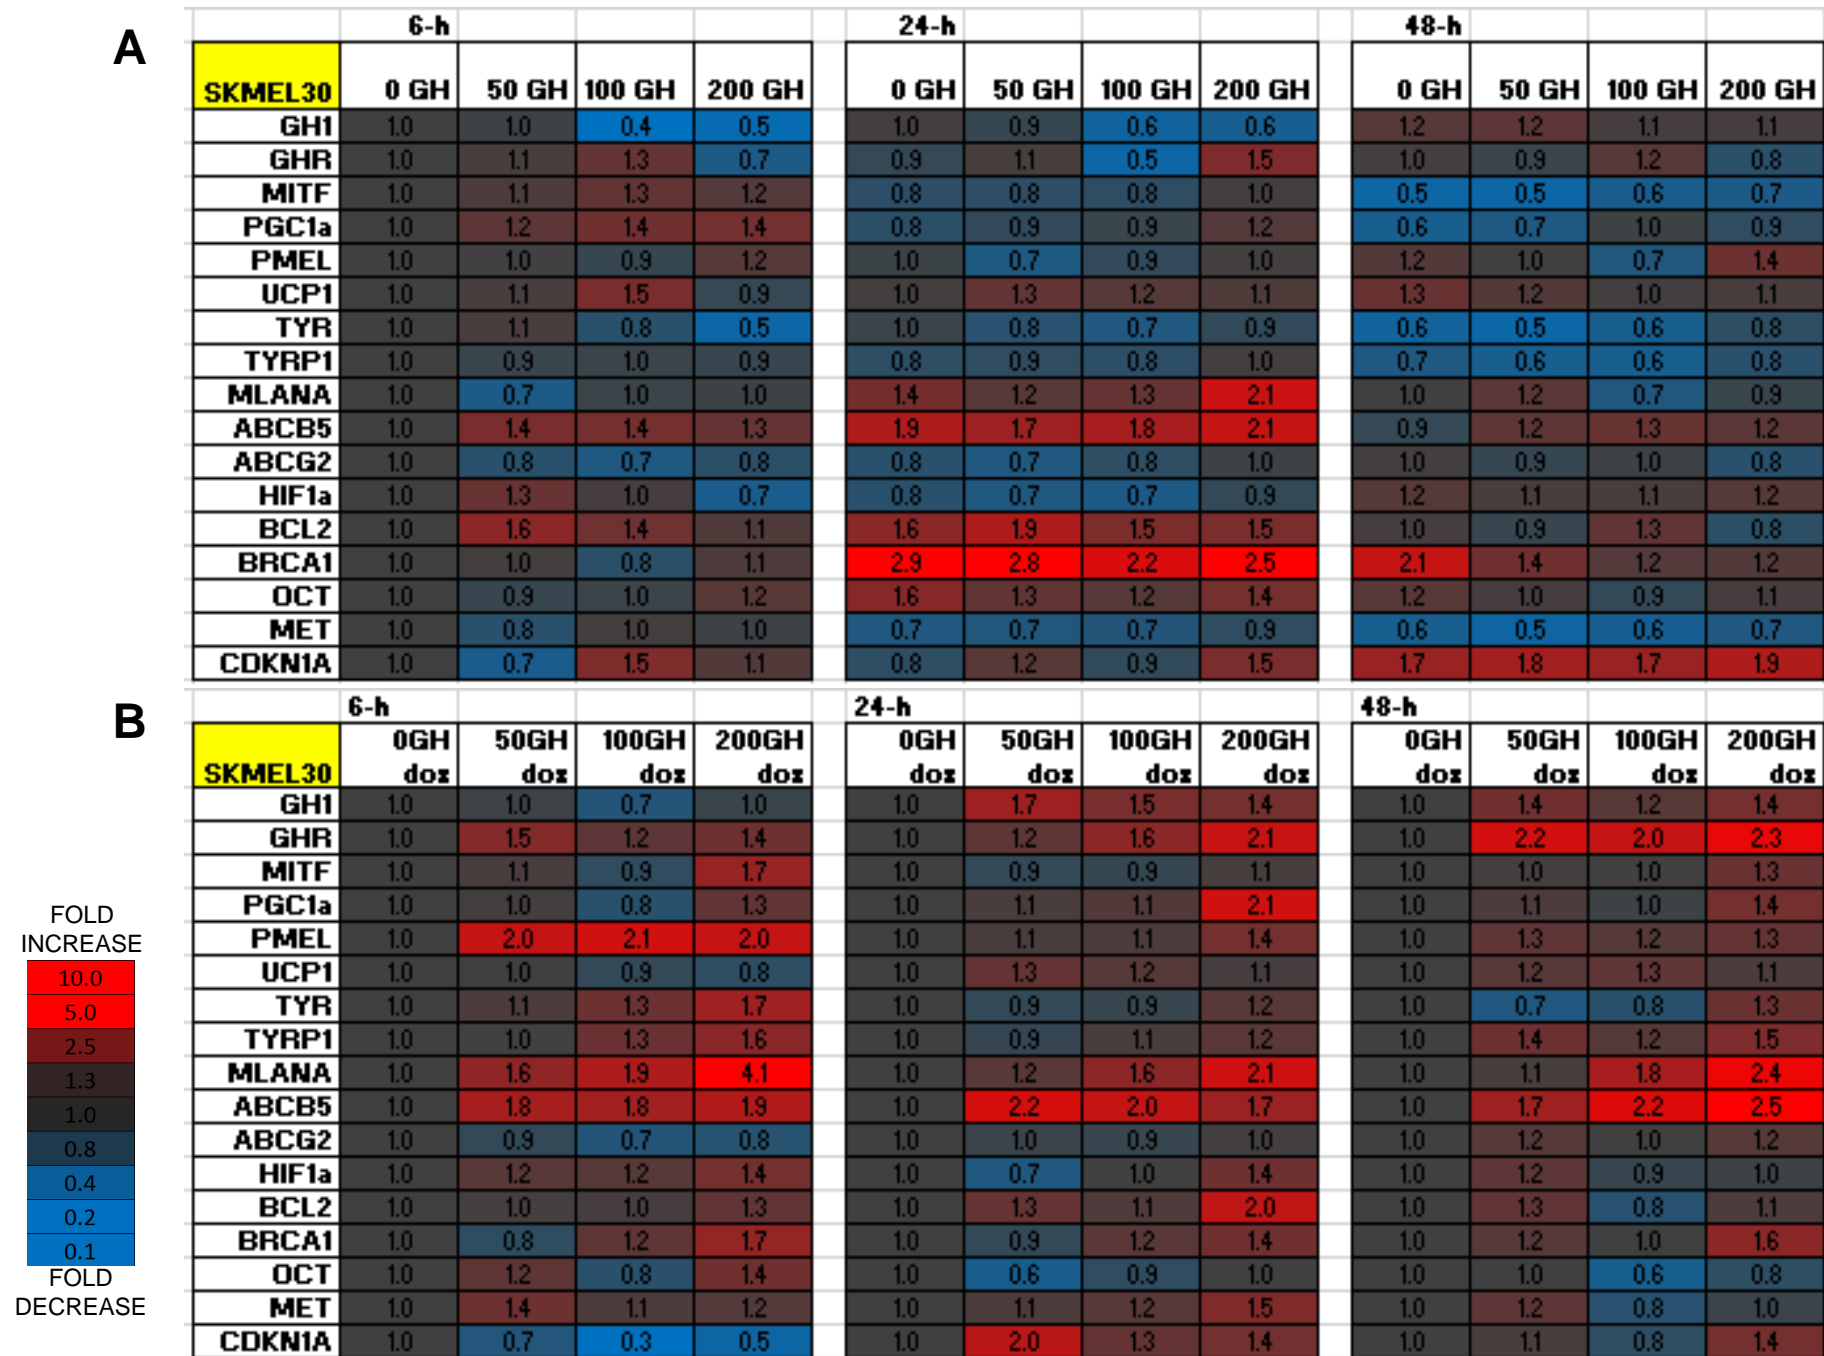

Sup-Fig 2: GH treatment directly upregulates MITF and MITF target RNA expressions in human melanoma cells

C

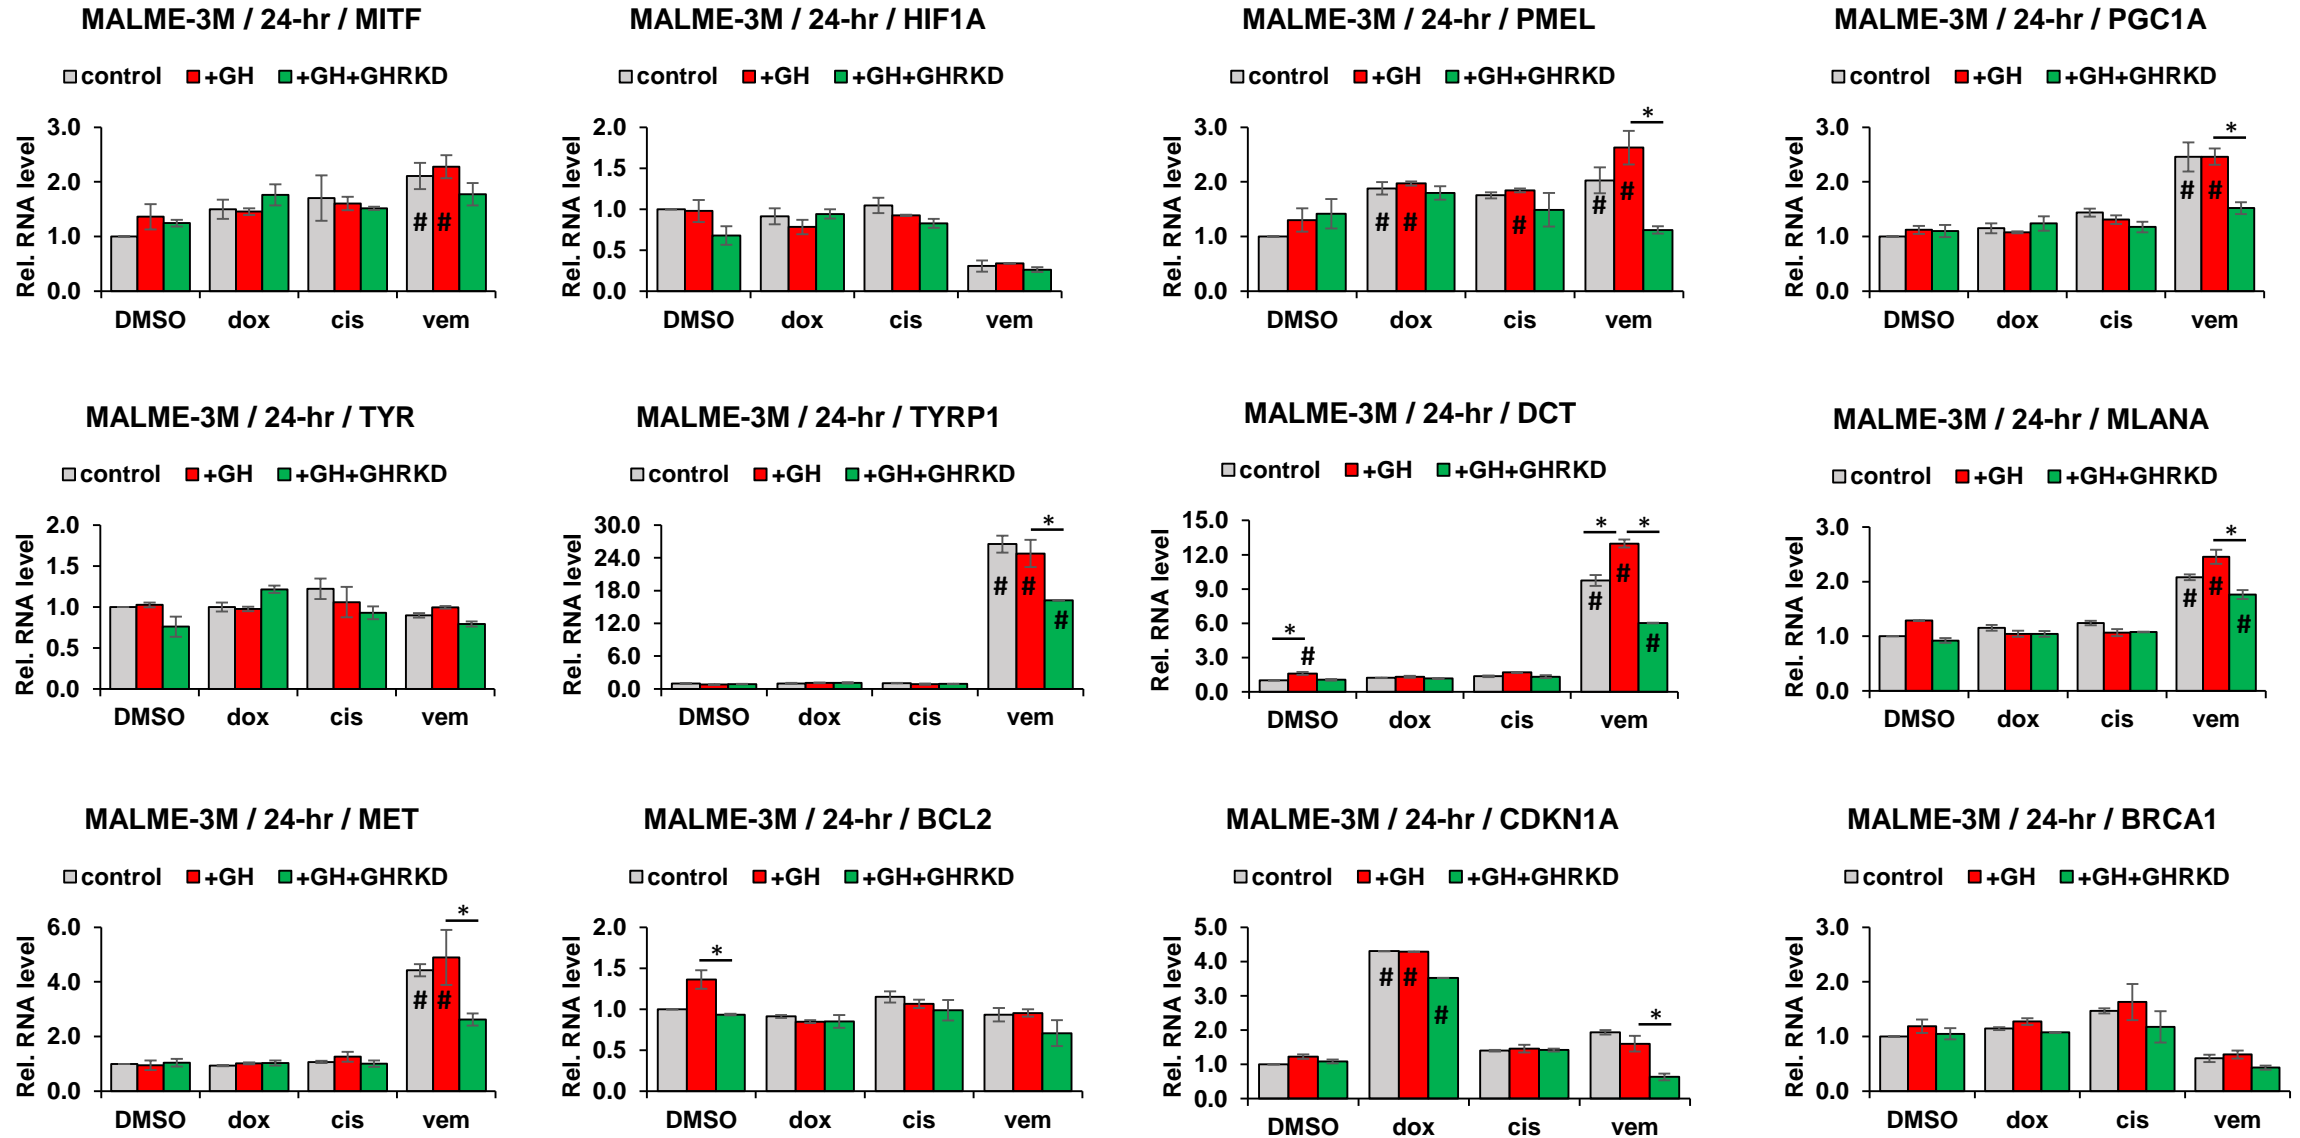

Sup-Fig 2: GH treatment directly upregulates MITF and MITF target gene expressions in human melanoma cells → MDA-MB-435

D

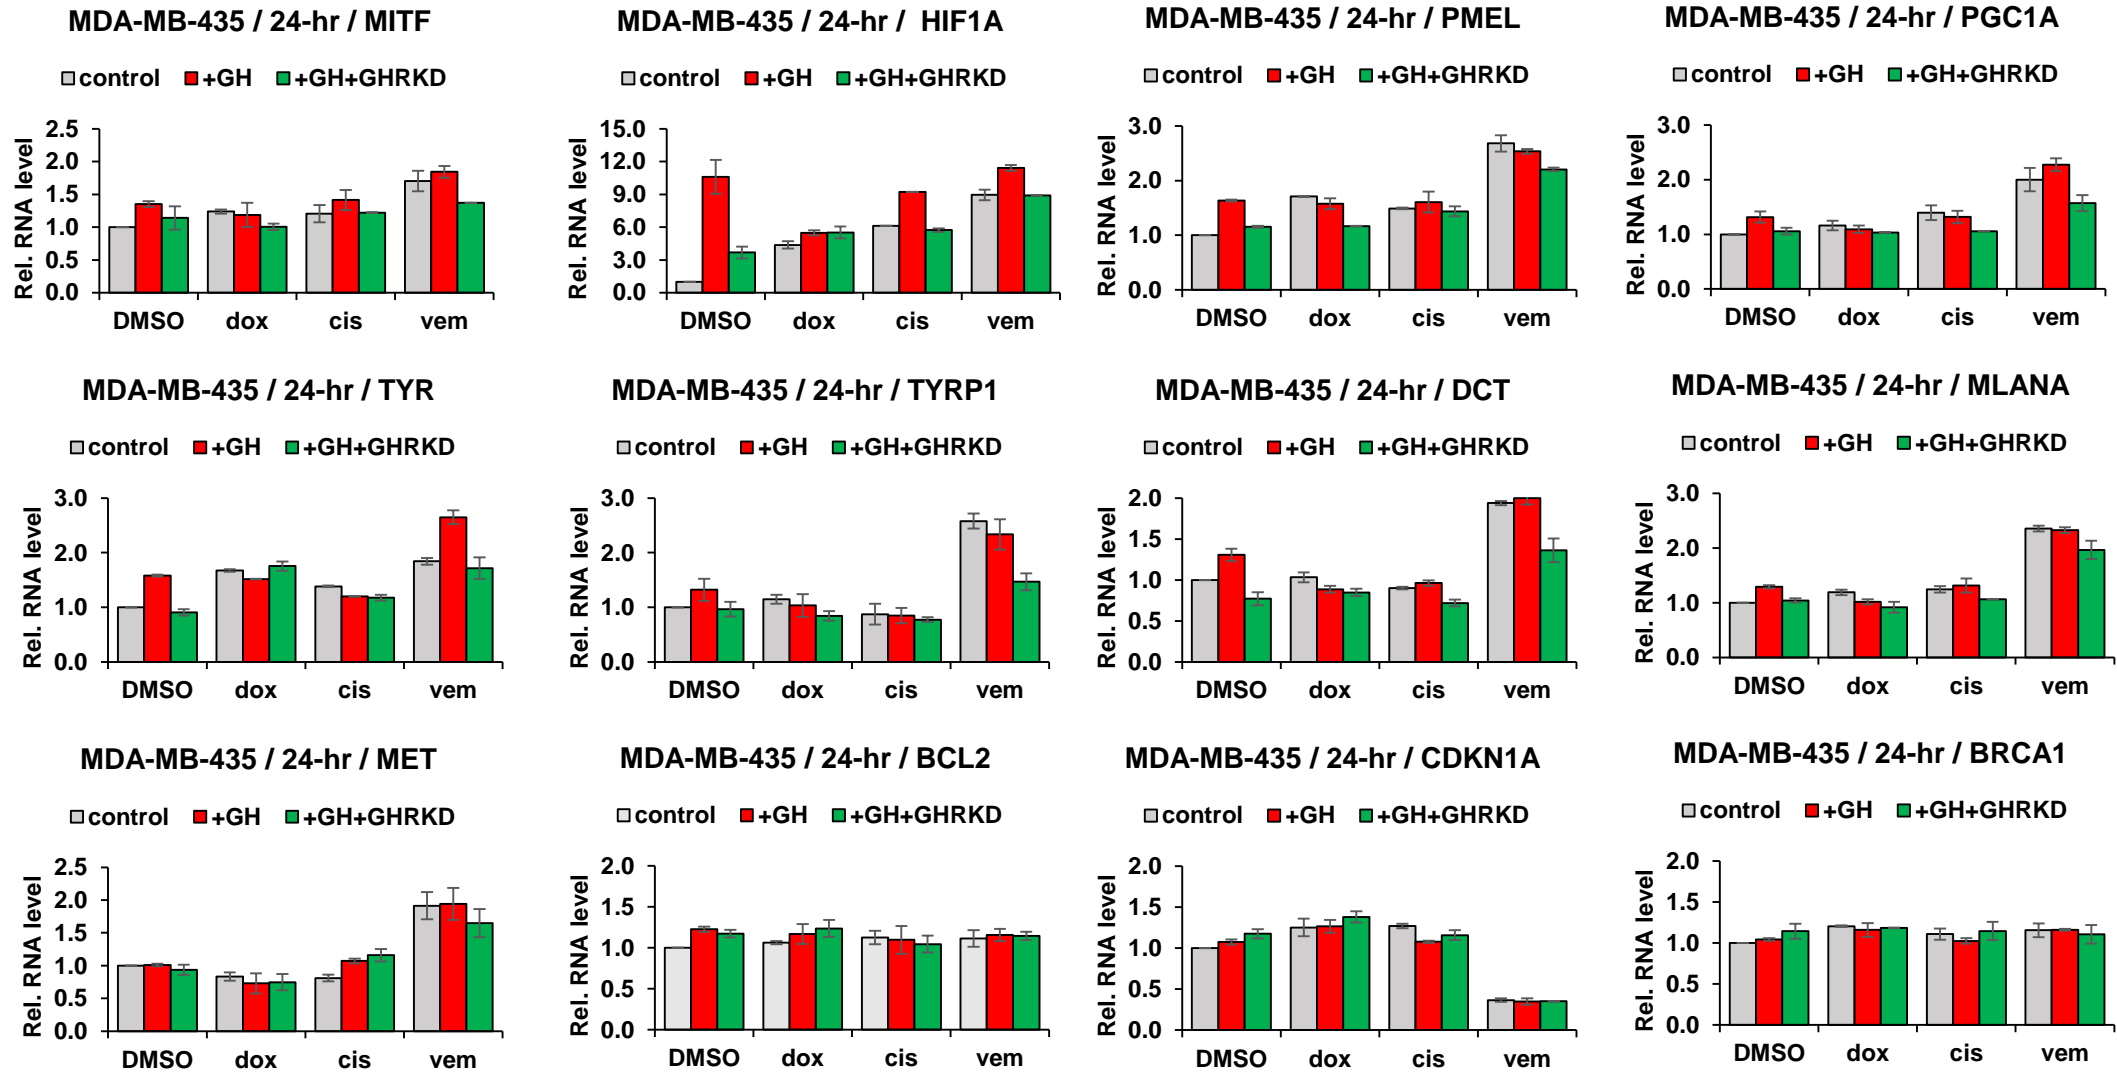

Sup-Fig 3: Effect of bovine growth hormone treatment on B16F10 mouse melanoma cells

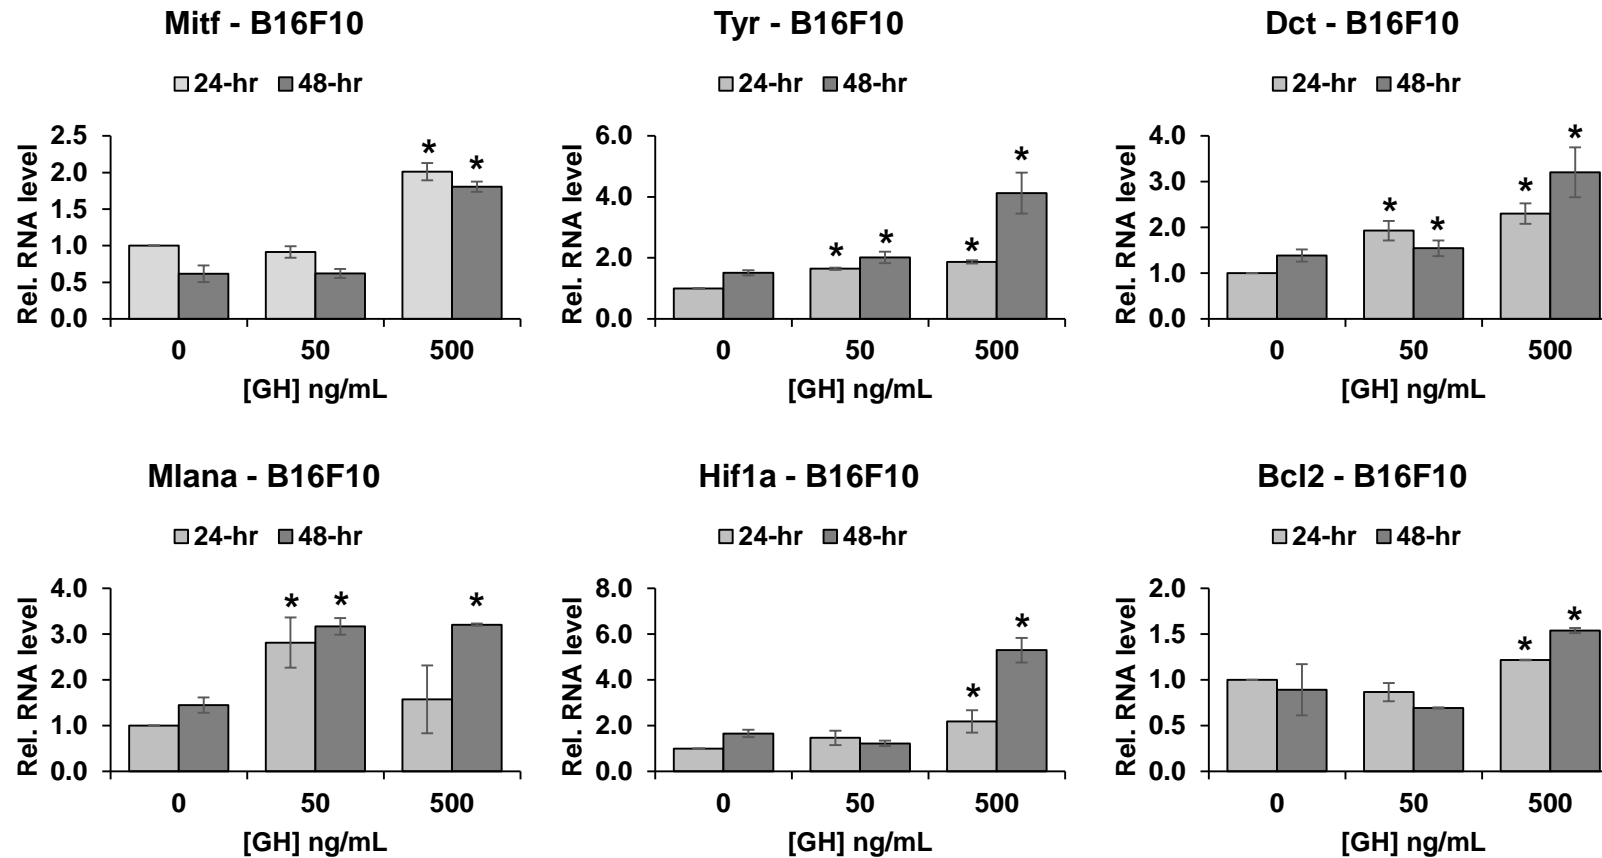

**Sup-Fig 3: Effect of bovine growth hormone treatment on B16F10 mouse melanoma cells:** Mouse melanotic melanoma cells B16F10 were treated with increasing doses (0, 50, 500ng/mL) of recombinant bovine growth hormone (bGH) for 24, and 48-hr timepoints and expression levels of Mitf and Mitf target genes were analyzed. RNA expressions were quantified by RT-qPCR and normalized against expression of  $\beta$ TUB and ACTB as reference genes [\* ,  $p < 0.05$ , Wilcoxon sign rank test,  $n = 3$ ].



**Sup-Fig 4: GH induced MITF increases PGC1A level and activity differentially**

**A**

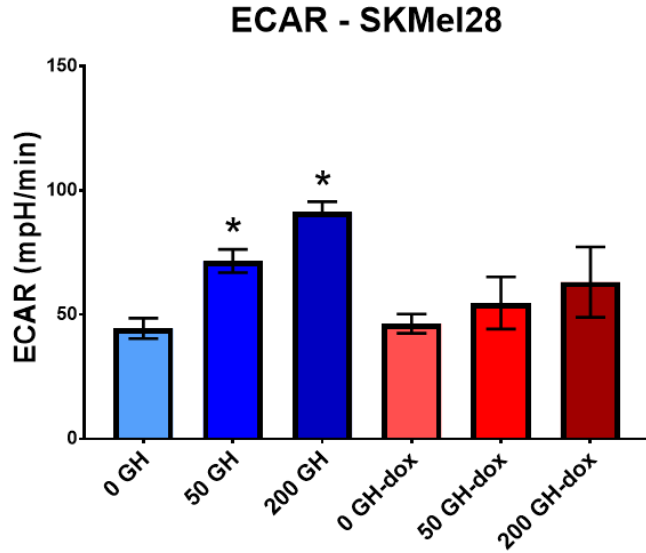

**B**

**SK-MEL-28: PGC1a – Relative RNA expression**

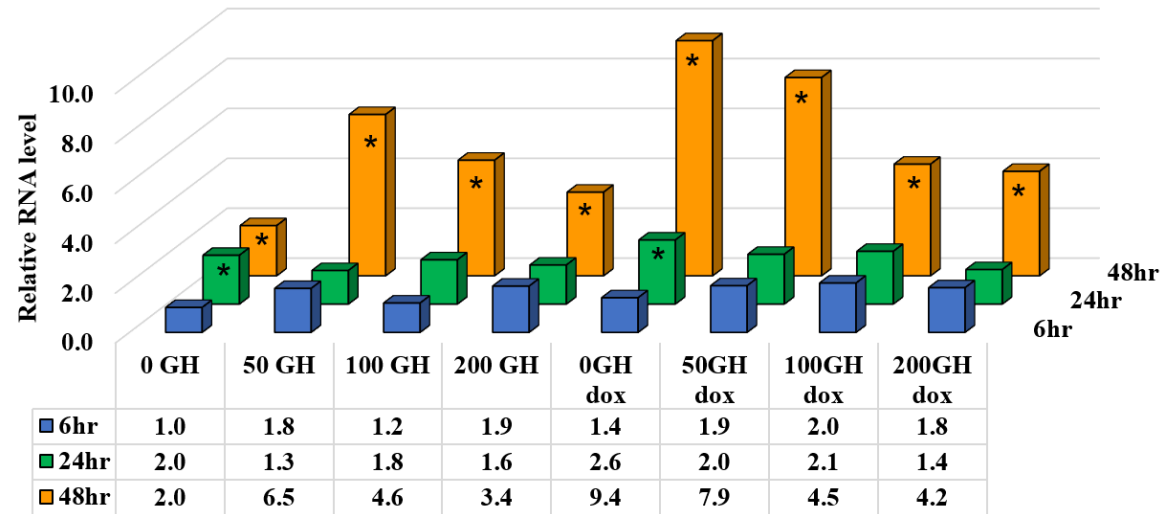

**Sup-Fig 4: GH enhances MITF target PGC1A expression and activity in human melanoma:** Human melanoma SK-MEL-28 cells show GH dose dependent (0, 50, 200ng/mL) increase in glycolysis (ECAR, extracellular acidification rate) in absence of chemotherapy. In presence of chemotherapy (200nM doxorubicin) the glycolytic increase was suppressed. (B) Mitochondrial OX-PHOS regulator PGC1A RNA expressions +/- GH, +/-doxorubicin treatments were quantified by RT-qPCR and normalized against expression of bTUB and ACTB as reference genes [\* ,  $p < 0.05$ , Wilcoxon sign rank test,  $n = 3$ ].

Sup-Fig 5: bGH mice melanoma tumors have higher endogenous GH production compared to WT mice tumors

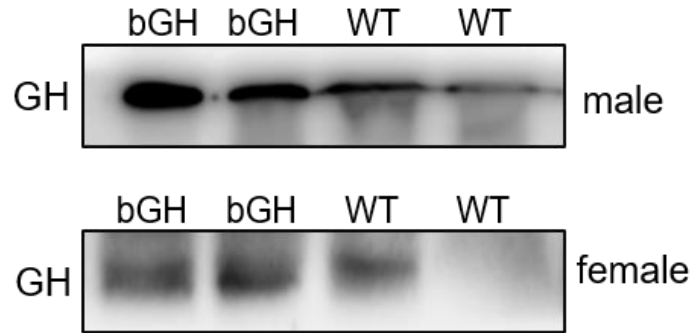

B16F10 mouse melanoma xenografts

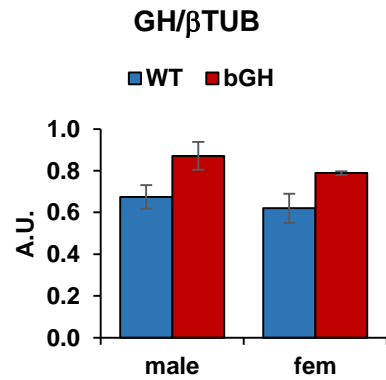

Sup-Fig 6: Melanoma stage specific deaths in GHR-high and GHR-low male and female melanoma patients in TCGA dataset

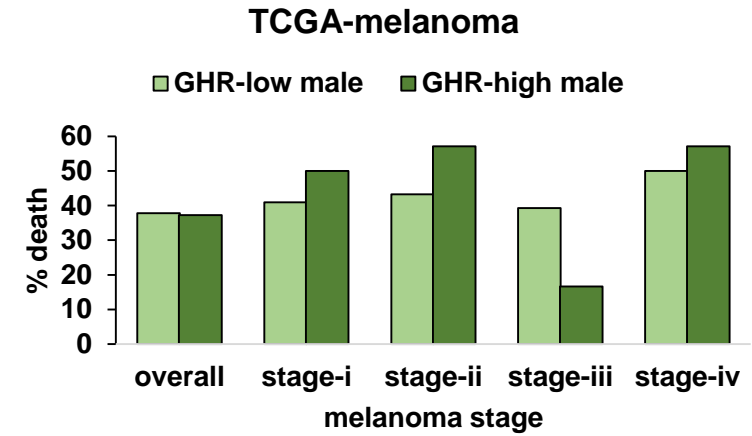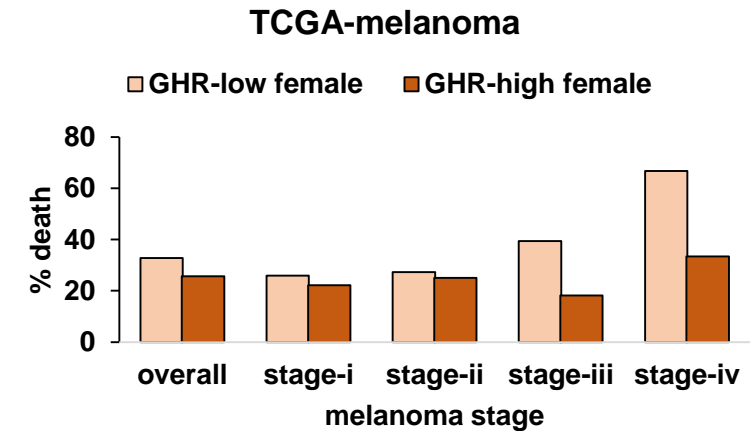

# Sup-Fig 7: Bioinformatic analysis: GHR, MITF, and MITF target genes co-express and strongly cluster (green box) in the CCLE dataset

Cancer Cell Line Encyclopedia (CCLE); 967 samples

Expression Heatmap

-3

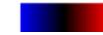

3

- No data

- GHR
- MITF
- TYR
- TYRP1
- HIF1A
- ITGA4
- KIT
- MET
- MLANA
- BCL2
- CDKN1A
- PMEL
- ACP5
- BEST1
- BIRC7
- CDK2
- CLCN7
- DCT
- EDNRB
- GPNMB
- GPR143
- MC1R
- OSTM1
- RAB27A
- SLC45A2
- TBX2
- TRPM1
- CADM1
- CTSK
- DIAPH1
- NDST2
- NGFR
- OSCAR
- PRKCB
- SERPINE1
- SLC11A1
- TPH1
- MBP
- TNFRSF14
- IRF4
- PLA1A
- APOLD1
- KCNN2
- INPP4B
- CAPN3
- LGALS3
- GREB1
- FRMD4B
- SLC1A4
- TBC1D16

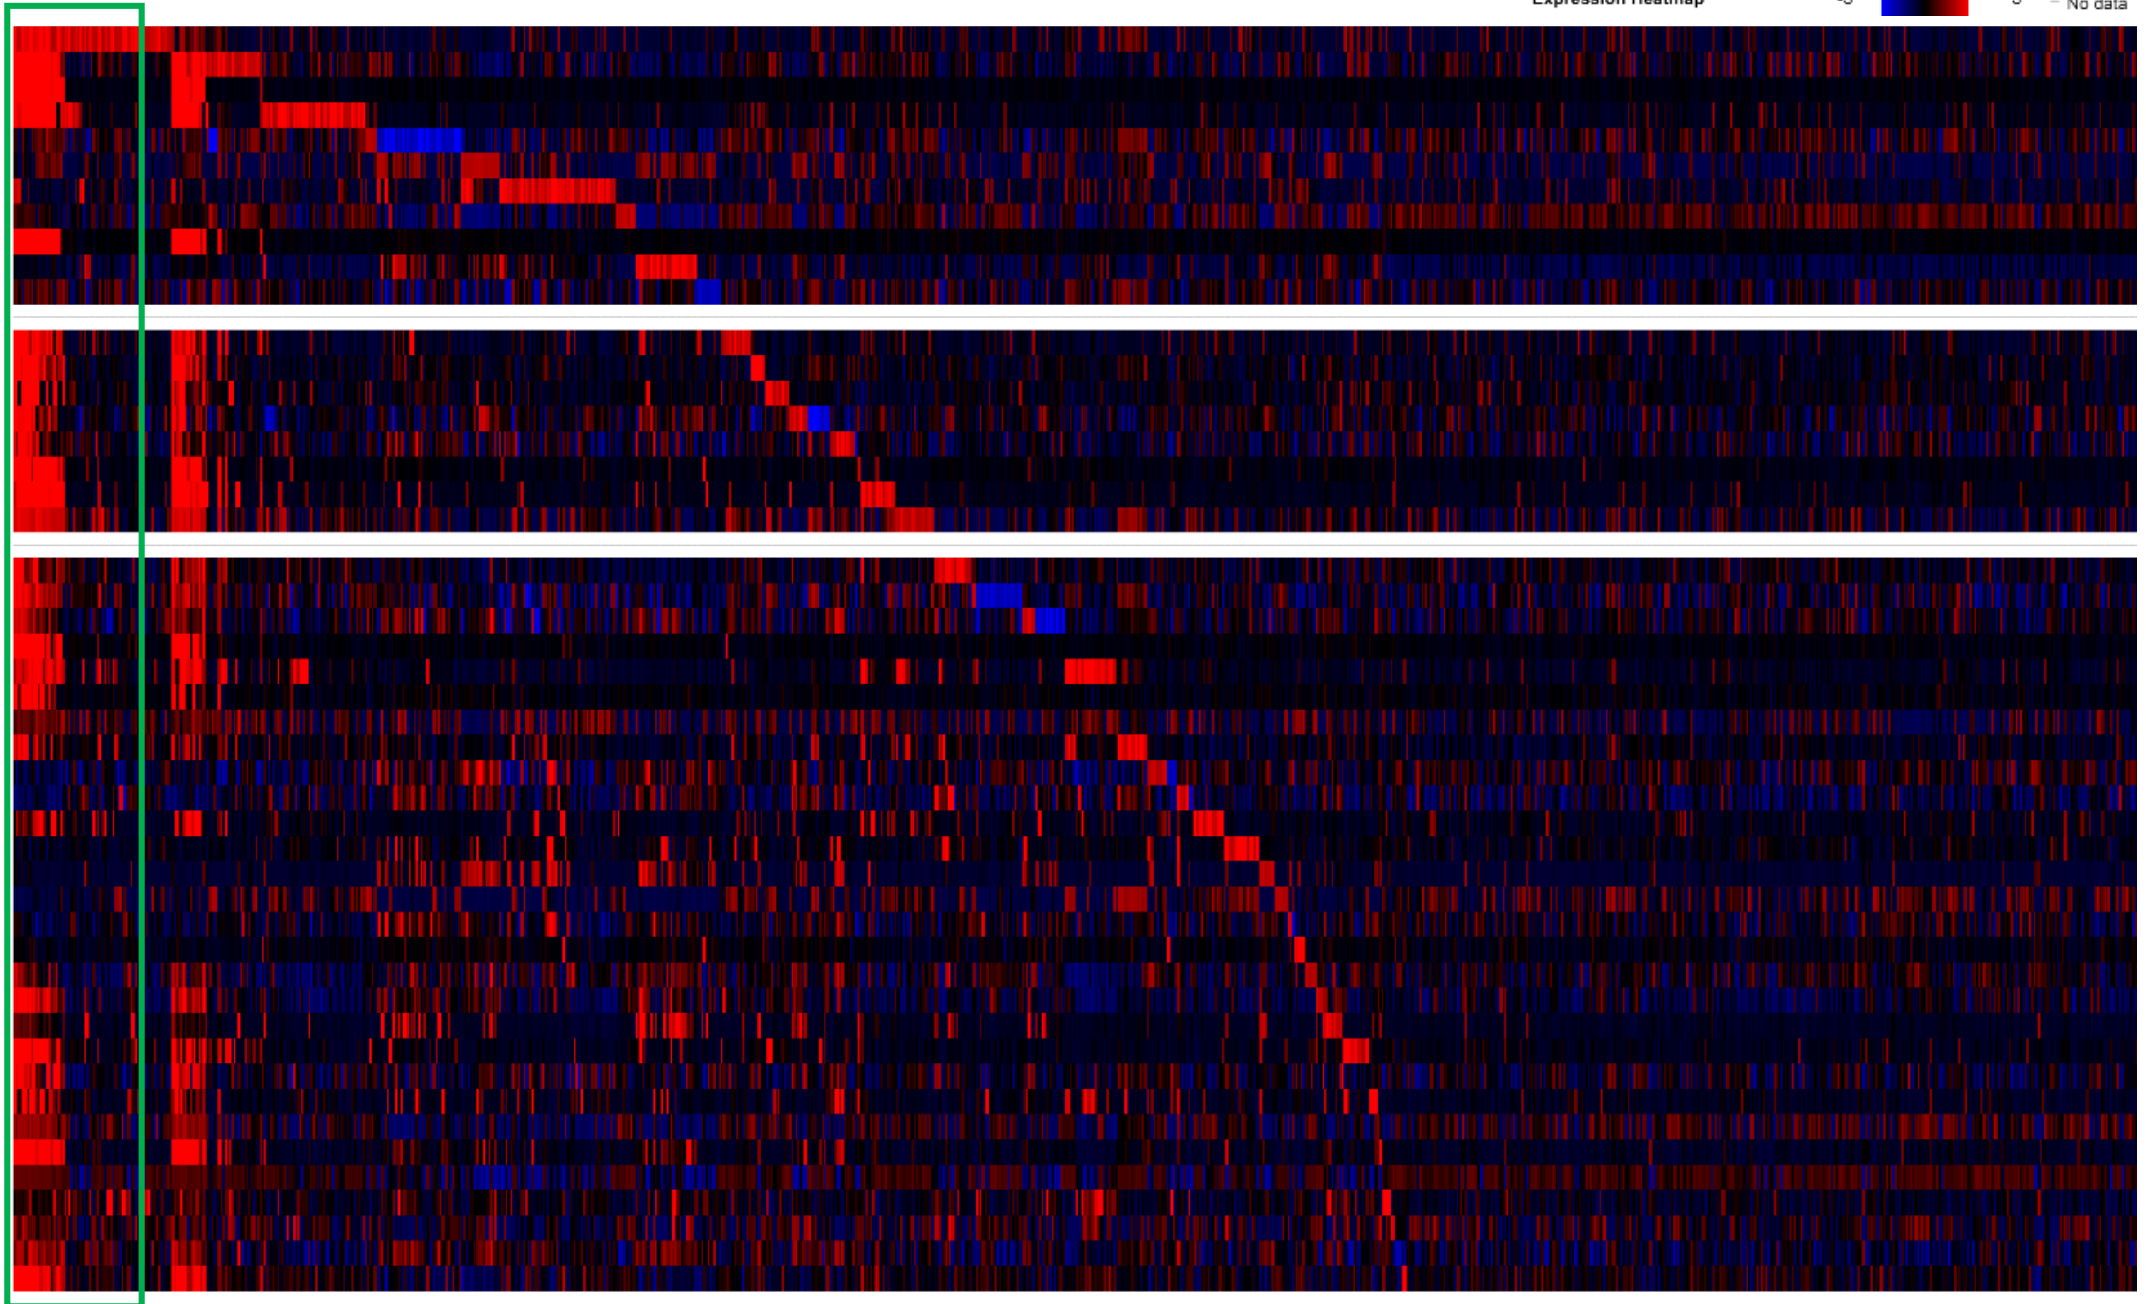

Sup-Fig 8: Bioinformatic analysis: TCGA datasets analyzed in the context of high (above mean) and low (below mean) GHR expressions show upregulated MITF, MITF targets, and ABC transporter expressions in the GHR-high cohort in both males and females

A

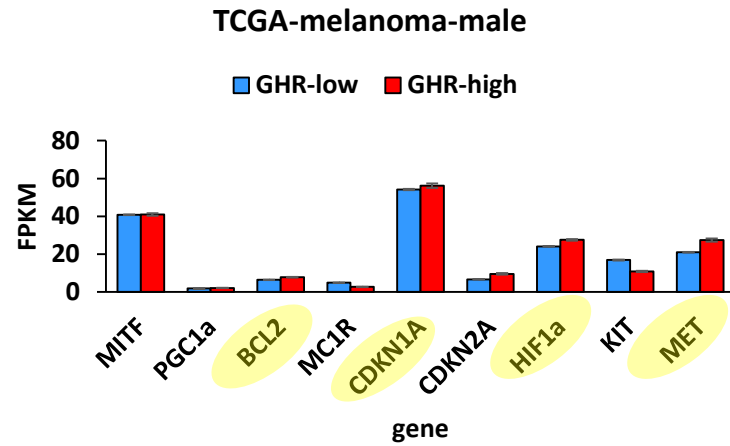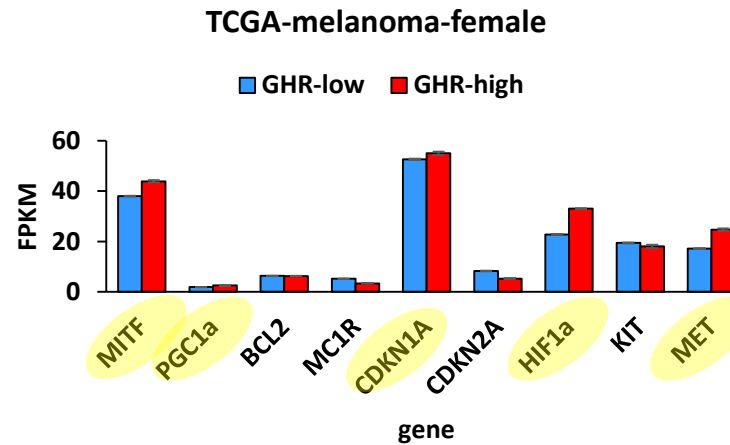

B

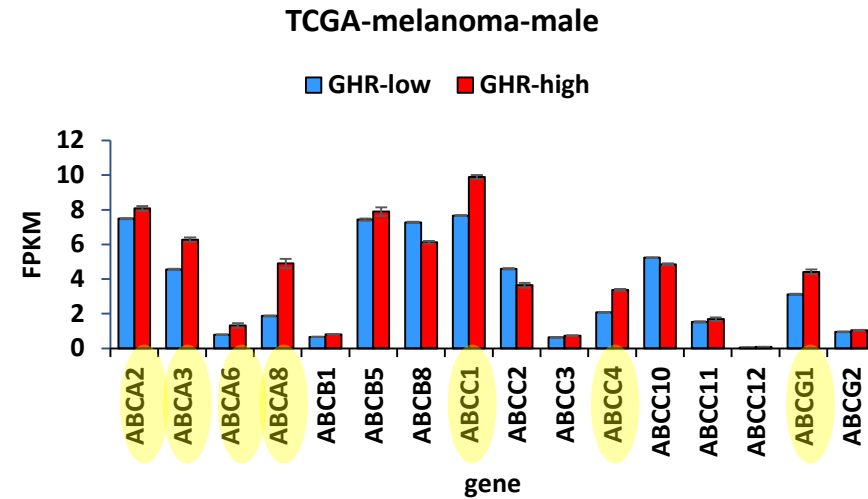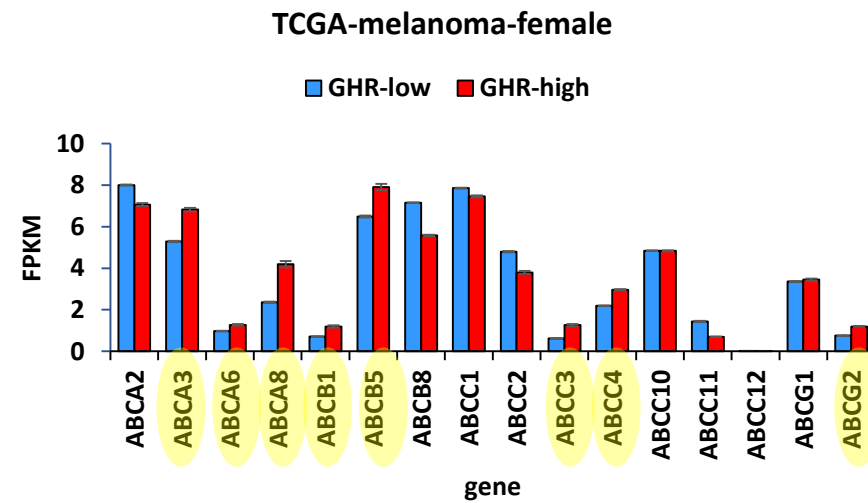

Sup-Fig 9: GH regulated MITF and MITF target gene regulation proceeds via JAK2-STAT5 and SRC regulated pathways → SK-MEL-28

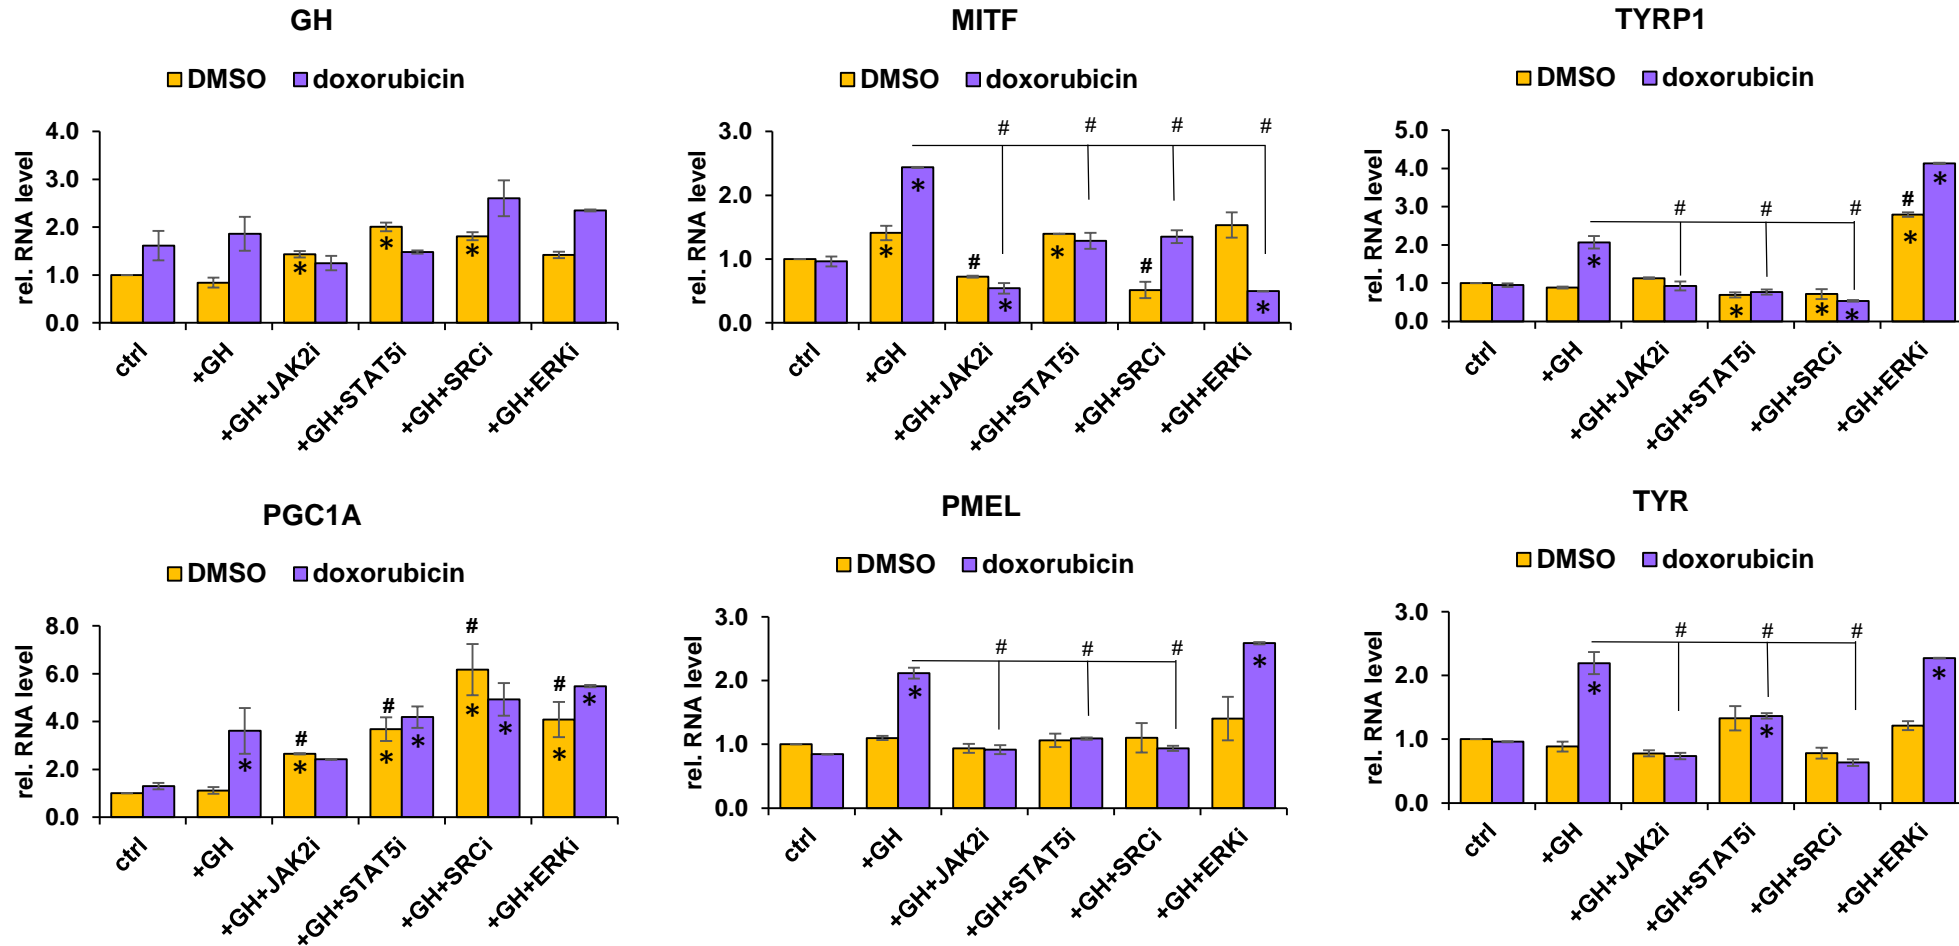

**Sup-Fig 9: GH regulated MITF and MITF target gene regulation proceeds via JAK2-STAT5 and SRC regulated pathways:** Human melanoma cell MDA-MB-435 (Fig 8), SK-MEL-28 (here) and SK-MEL-30 (Sup-Fig 10) were treated with /without doxorubicin in presence of GH as well as different intracellular signaling pathway inhibitors. After 24-hr treatments, RNA expression for target genes (GH, MITF and MITF targets) was quantified by RT-qPCR and normalized against expression of  $\beta$ TUB and ACTB as reference genes [#,\*;  $p < 0.05$ , Wilcoxon sign rank test,  $n = 3$ ; \* indicates comparison against corresponding -GH controls while # indicates comparison against corresponding +GH controls in DMSO and doxorubicin treated groups].

Sup-Fig 10: GH regulated MITF and MITF target gene regulation proceeds via JAK2-STAT5 and SRC regulated pathways → SK-MEL-30

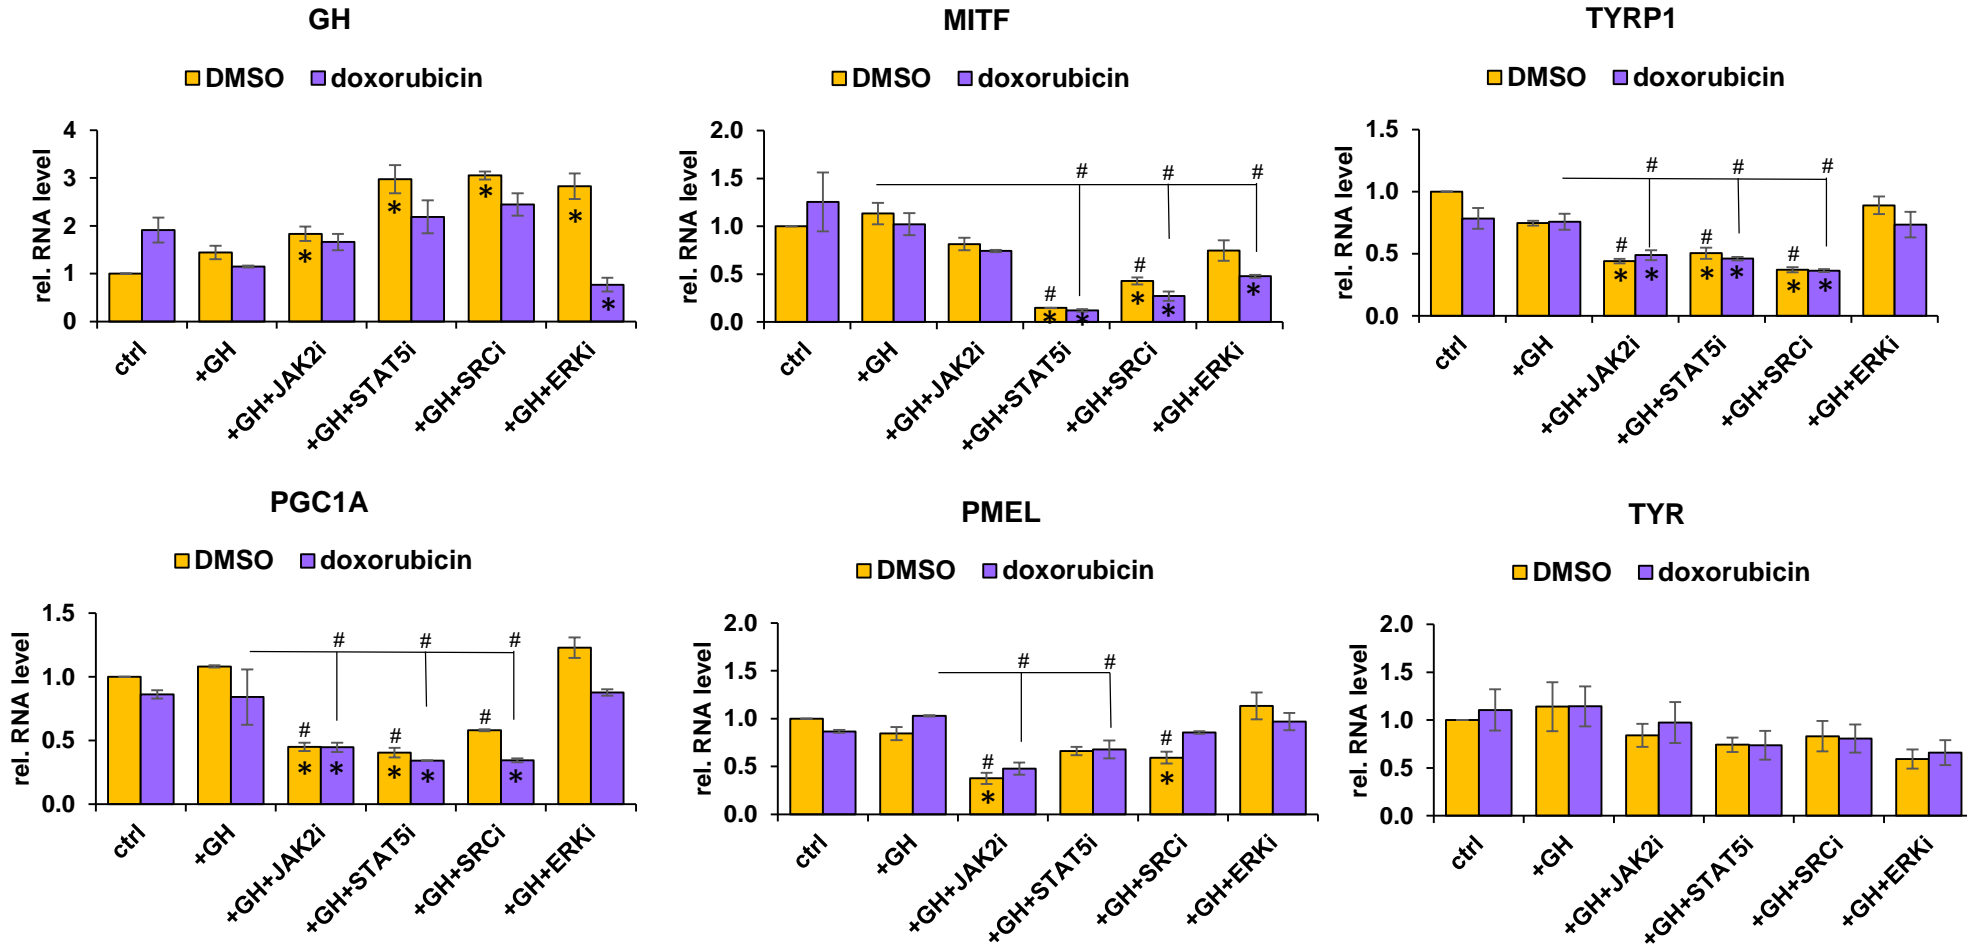

**Sup-Fig 10: GH regulated MITF and MITF target gene regulation proceeds via JAK2-STAT5 and SRC regulated pathways:** Human melanoma cell MDA-MB-435 (Fig 8), SK-MEL-28 (Sup-Fig 9) and SK-MEL-30 (here) were treated with /without doxorubicin in presence of GH as well as different intracellular signaling pathway inhibitors. After 24-hr treatments, RNA expression for target genes (GH, MITF and MITF targets) was quantified by RT-qPCR and normalized against expression of  $\beta$ TUB and ACTB as reference genes [#,\*;  $p < 0.05$ , Wilcoxon sign rank test,  $n = 3$ ; \* indicates comparison against corresponding -GH controls while # indicates comparison against corresponding +GH controls in DMSO and doxorubicin treated groups].

Sup-Fig 11: Effect of prolactin (PRL) treatment on human melanoma cells

**RT-qPCR Ct values**

|              | MDAMB435 | SKMEL28 | SKMEL30 | MALME3M |
|--------------|----------|---------|---------|---------|
| <b>GHR</b>   | 26.1     | 25.4    | 26.1    | 25.1    |
| <b>PRLR</b>  | 30.6     | 29.4    | 30.3    | 30.8    |
| <b>GAPDH</b> | 15.1     | 15.6    | 14.9    | 15.5    |

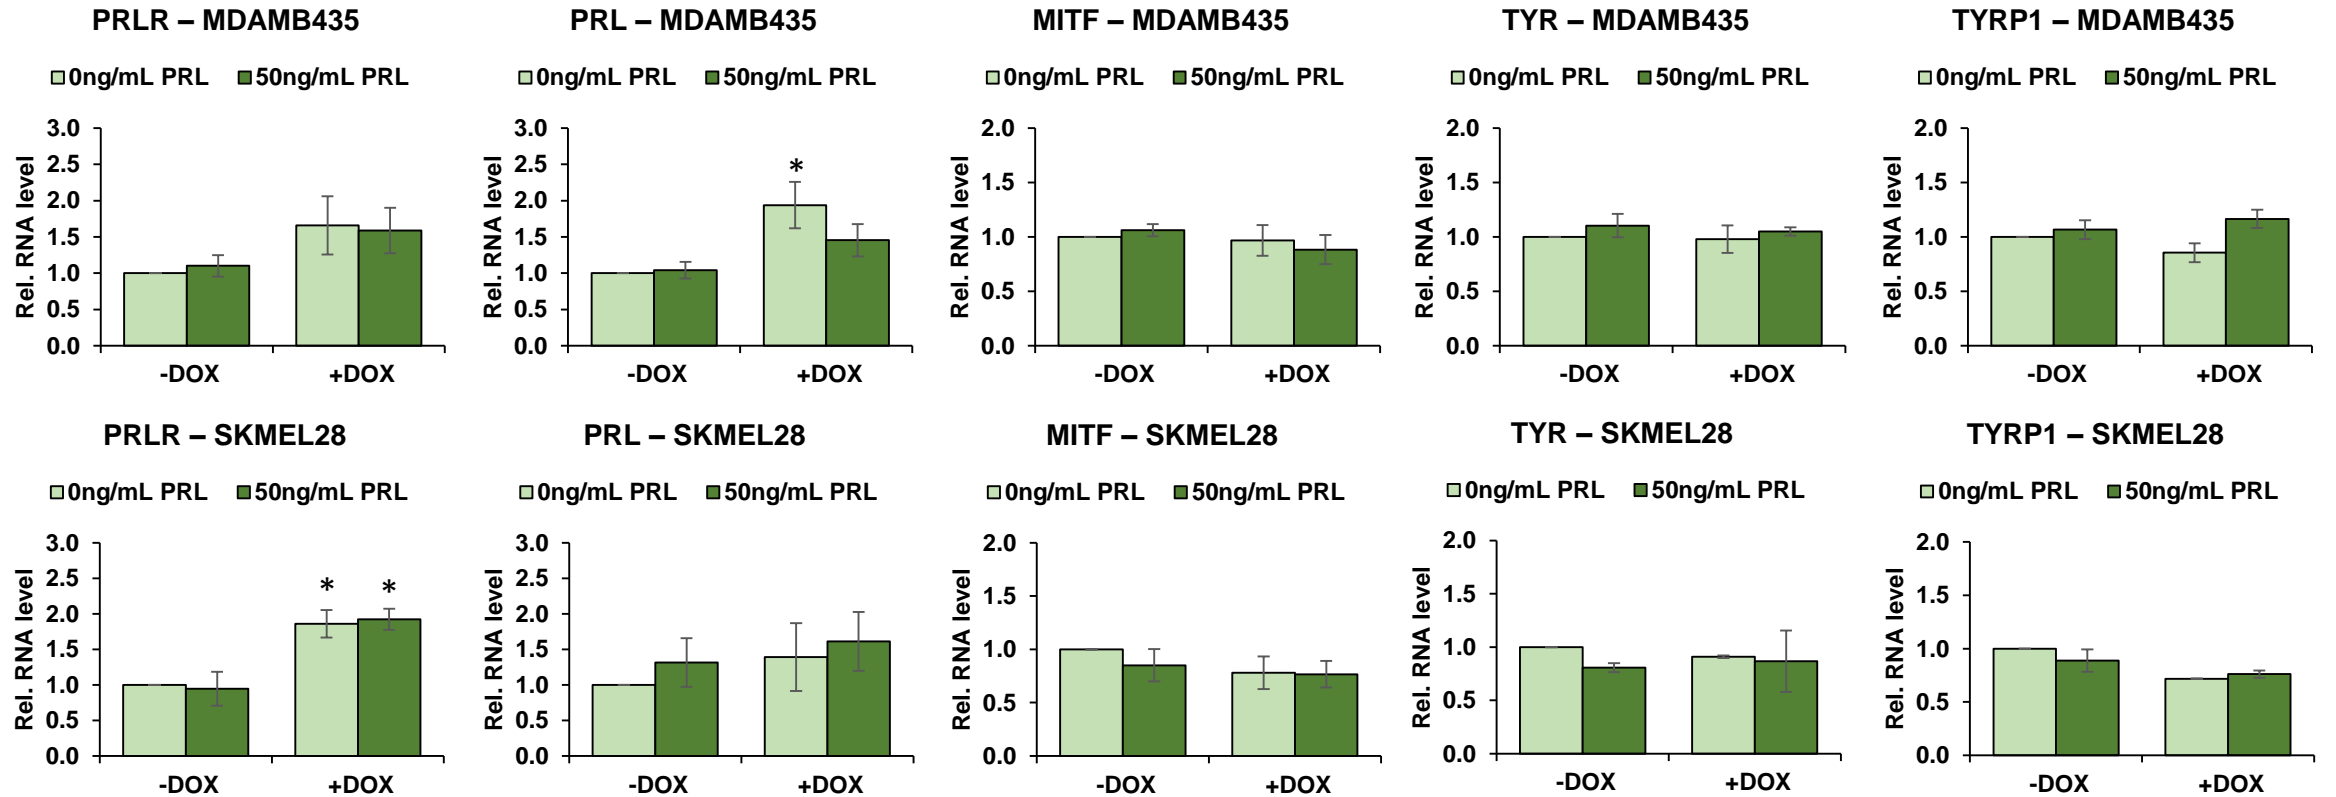

Sup-Fig 12: siRNA-mediated GHR knock down (GHRKD) in human melanoma cells:

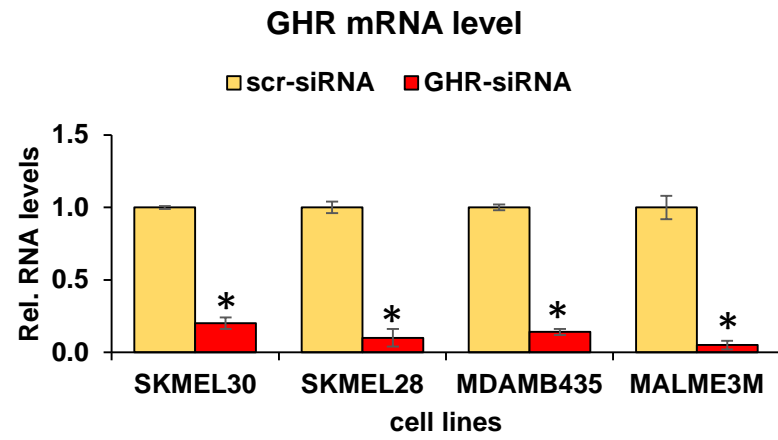



# Primer List

| target gene | primer direction | sequence (5'-3')       |
|-------------|------------------|------------------------|
| GAPDH       | F                | CTTTGCGTCGCCAG         |
|             | R                | TTGATGGCAACAATATCCAC   |
| GHR         | F                | CTCCTCAAGGAAGGAAAATTAG |
|             | R                | GTGGAATTCGGGTTTATAGC   |
| MITF        | F                | CAGTACCTTTCTACCACTTTAG |
|             | R                | CCTCTTTTTCACAGTTGGAG   |
| PRL         | F                | GGTTCATCCTGAAACCAAAG   |
|             | R                | CTTCAGGAGCTTGAGATAATTG |
| TYRP1       | F                | GATTCCACTCTAATAAGCCC   |
|             | R                | CTGTTACAAAGTGTCCAG     |
| EGFR        | F                | GGAAAAGAAAGTTTGCCAAG   |
|             | R                | ATGAGGACATAACCAGCC     |
| MET         | F                | CATGTGAATTTTCTCCTGGAC  |
|             | R                | ATCTTCTTCCCAGTGATAACC  |
| UCP1        | F                | ACAGCACCTAGTTTAGGAAG   |
|             | R                | CTGTACGCATTATAAGTCCC   |
| PPARGC1A    | F                | GCAGACCTAGATTCAAACCTC  |
|             | R                | CATCCCTCTGTCACTCCTC    |
| ABCA1       | F                | CTGGGATATGTGCAATTACG   |
|             | R                | CCATACAGCAAAAGTAGAAGG  |
| ABCA6       | F                | CCATATGCTATGGGAATCATC  |
|             | R                | AGCTGAGAAATCTTCTTTCC   |
| ABCA5       | F                | TGTTCAAATCATGTGAGGC    |
|             | R                | TTCAACTGTATAATGGCAGC   |
| ABCC6       | F                | AGGCTGATTGGATCATAGTG   |
|             | R                | GTTTCTCCTTCTCCTCTATCTC |
| ABCC8       | F                | GGTTTACTTTGTCTCATCCC   |
|             | R                | TCTGTATTGCTCCTCTCAAG   |
| ABCC3       | F                | TTTTCTGGTGGTTCACAAAG   |
|             | R                | GGATCTGTCTCTTCTTTAG    |
| ABCC4       | F                | ATGGAGATAGGAATATCGTGC  |
|             | R                | TCCTCAGTGATGAGAACAAC   |
| ACTB        | F                | GACGACATGGAGAAAATCTG   |
|             | R                | ATGATCTGGTCACTTTCTC    |
| GAPDH       | F                | CTTTTGCCTGCCAG         |
|             | R                | TTGATGGCAACAATATCCAC   |
| TYR         | F                | CAACAGCCATCAGTCTTTATG  |
|             | R                | CCTTCCAGTGATTTCTAAAAGC |
| BCL2        | F                | GATTGTGGCCTTCTTTGAG    |
|             | R                | GTTCCACAAGGCATCC       |
| BRCA1       | F                | CTATCATCCAAAGTATGGGC   |
|             | R                | TTTCCAAGGAAGGATTTTCG   |
| CDKN1A      | F                | CAGCATGACAGATTTCTACC   |
|             | R                | CAGGGTATGTACATGAGGAG   |
| DCT         | F                | TAGCTTGGATGACTACAACC   |
|             | R                | TTCTGAAACTGAAGGTAGAG   |
| MLANA       | F                | AGCCTTGATGGATAAAAGTC   |
|             | R                | CGATGATCAAACCTTCTTTG   |
| HIF1A       | F                | GAAACTACTAGTGCCACATC   |
|             | R                | GGAAGTGTAGTCTTTGACTC   |
| ABCD1       | F                | CTCAACATCAGGGTGGAG     |
|             | R                | CTCTGCGGGATGTAGAAC     |
| PMEL        | F                | TAGAGAGCTACCTATCCCTG   |
|             | R                | GAACCTGTAATACTTTCCGTAG |
| UCP1        | F                | ACAGCACCTAGTTTAGGAAG   |
|             | R                | CTGTACGCATTATAAGTCCC   |
| ABCA9       | F                | CCCAGCTTATACATTTGGAC   |
|             | R                | ACCAACATGAAAAGAGTAGC   |
| ABCA8       | F                | TCATTATGGCCCTTTTCTTG   |
|             | R                | TTAAGAAAGCCAAGCTACC    |

| target gene | primer direction | sequence (5'-3')       |
|-------------|------------------|------------------------|
| Actb        | F                | GATGTATGAAGGCTTTGGTC   |
|             | R                | TGTCGACTTTTATTGGTCTC   |
| Abcc2       | F                | CGTATATAAGAAGGCACTAACC |
|             | R                | CAATCTGTAAAACACTGGACC  |
| Abcc1       | F                | GTCTATCGTAAGGCTCTTTTG  |
|             | R                | GACCAGATCATGTTAATGTACG |
| Abcg2       | F                | AAGAGCCAGTCTATGTTACC   |
|             | R                | AAACTCCAGCTCTATTTTGC   |
| Abcb8       | F                | GCTCTAAAGCAGAAGAAGT    |
|             | R                | CCAAGACCATACAGTTGAAAG  |
| Abcc4       | F                | AAACAAAGTCATCCTGTTTCG  |
|             | R                | CAGAAAGTTCTTGATCCTCC   |
| Gh          | F                | TCCAGTCTGTTTTCTAATGC   |
|             | R                | TCGAACTCTTTGTAGGTGTC   |
| Ghr         | F                | ACTGTCCAGTGTACTCATTG   |
|             | R                | CTGGATATCTTCTTACATGC   |
| Igf1        | F                | GACAAAACAAGAAAACGAAGC  |
|             | R                | ATTTGGTAGGTGTTTTCGATG  |
| Abcb5       | F                | CATCGGAACTATTTCTTGCTG  |
|             | R                | ACATTCAGGTACAAATCCAG   |
| Tubb5       | F                | CTTGTTTCGGTACCTACATTG  |
|             | R                | CATGTTTCATCGCTTATCACC  |
| Bcl2        | F                | ATGACTGAGTACCTGAACC    |
|             | R                | ATATAGTTCCACAAAGGCATC  |
| Brca1       | F                | TCTAACCTTGGAAATCGTGAG  |
|             | R                | GAGTCTAGTTCAATGTAGACAG |
| Cdkn1a      | F                | CTGACAGATTTCTATCACTCC  |
|             | R                | TTAAGACACACAGAGTGAGG   |
| Dct         | F                | TTGATCTGTCAGAGGAAGAAG  |
|             | R                | TGTATTGAAGAAAAGCCAGC   |
| Hif1a       | F                | CTGATCATCTGACCAAAACTC  |
|             | R                | CGTGCTGAATAATACCACTTAC |
| Tyr         | F                | AGCAGATGTGGAATTTTGTGTC |
|             | R                | AAATCCTTCCAGTGTGTTTC   |
| Mlana       | F                | AGAACCTTGATGGACAAAAG   |
|             | R                | TTCTCTTGAGAAAGACAGTCG  |
| Pmel        | F                | CATTAGCCCTCTACTGGATG   |
|             | R                | CTTTCAATACCCTGGACAATG  |
| Mitf        | F                | GCTAAAAGAGAGGCAGAAAAAG |
|             | R                | GCATGTCTGGATCATTTGAC   |
| Ucp1        | F                | CTTTTTCAAAGGTTTGTGG    |
|             | R                | CTTATGTGGTACAAATCCACTG |
| Abca9       | F                | CTTTCTCATGAGTGTGTTG    |
|             | R                | GTCCAAATGTATAAGCTGGG   |
